# Supplementary material for: Functionalized poly(lactic acid) based nano-fabric for anti-viral applications
Source: Royal Society of Chemistry journal article supplement (doi:10.1039/d1ra05352c), 2021-01-01
Supplement: d1ra05352c1.pdf [file d1ra05352c1.pdf]

## Functionalized Poly(lactic acid) based Nano-fabric for Anti-Viral Application

Doli Hazarika<sup>1</sup>, Naba Kumar Kalita<sup>1</sup>, Amit Kumar<sup>1</sup> and Vimal Katiyar<sup>\*1</sup>

<sup>1</sup>Chemical Engineering Department, Indian Institute of Technology Guwahati, Assam-781039, India

\*Corresponding author's e-mail: vkatiyar@iitg.ac.in

### Supplementary Information

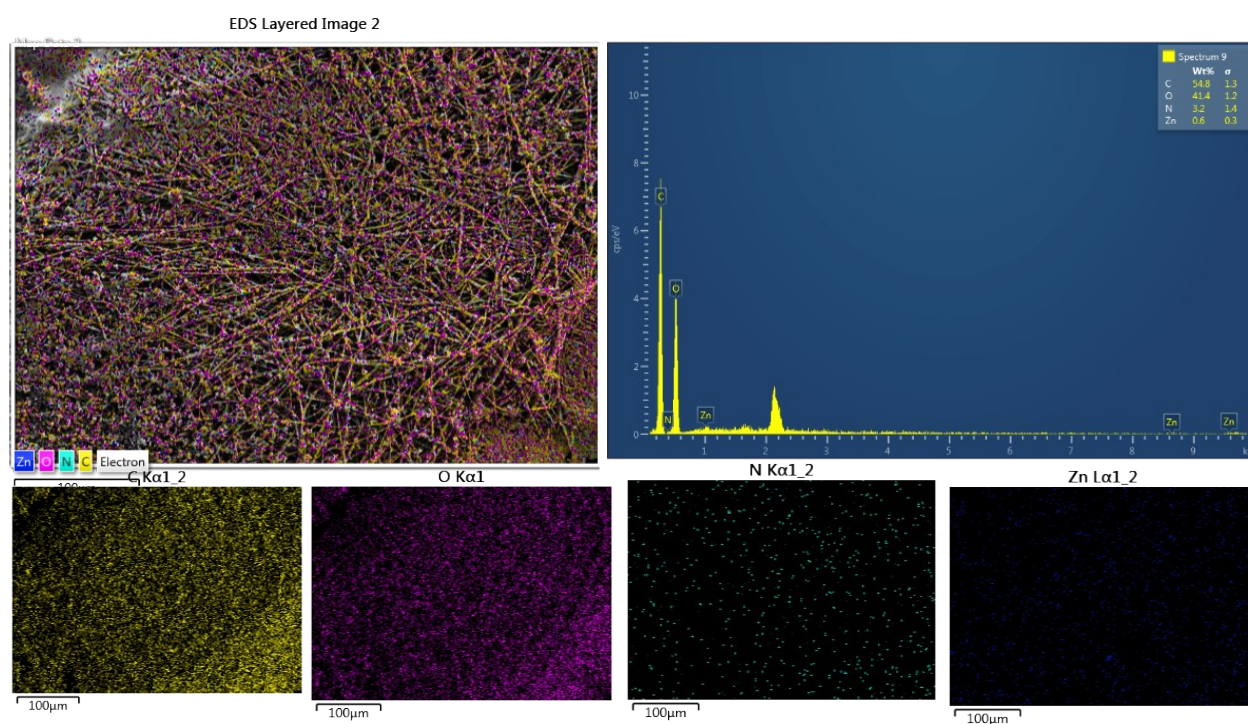

**Figure S1:** EDX image of fabricated PZ15S<sub>1</sub>, With distribution of elements C,O,N,Zn elements and its mapping.

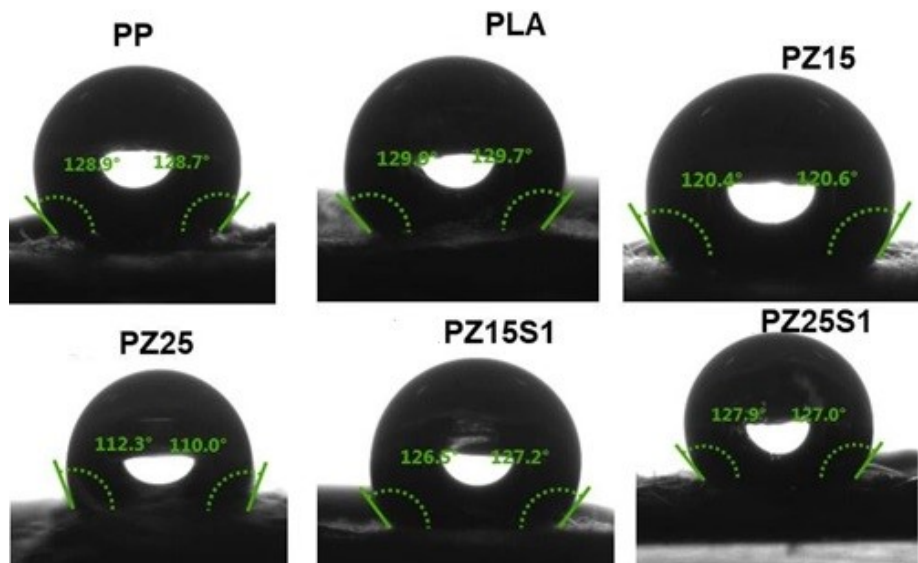

Figure S2: Water contact angles of the test samples

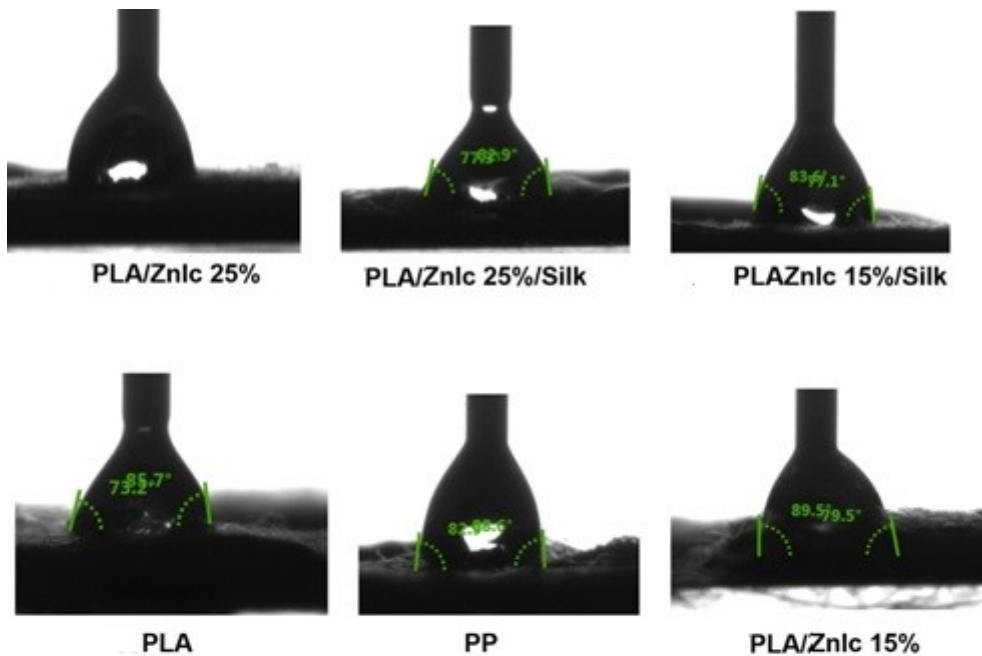

Figure S3: Receding water contact angle of the tested samples

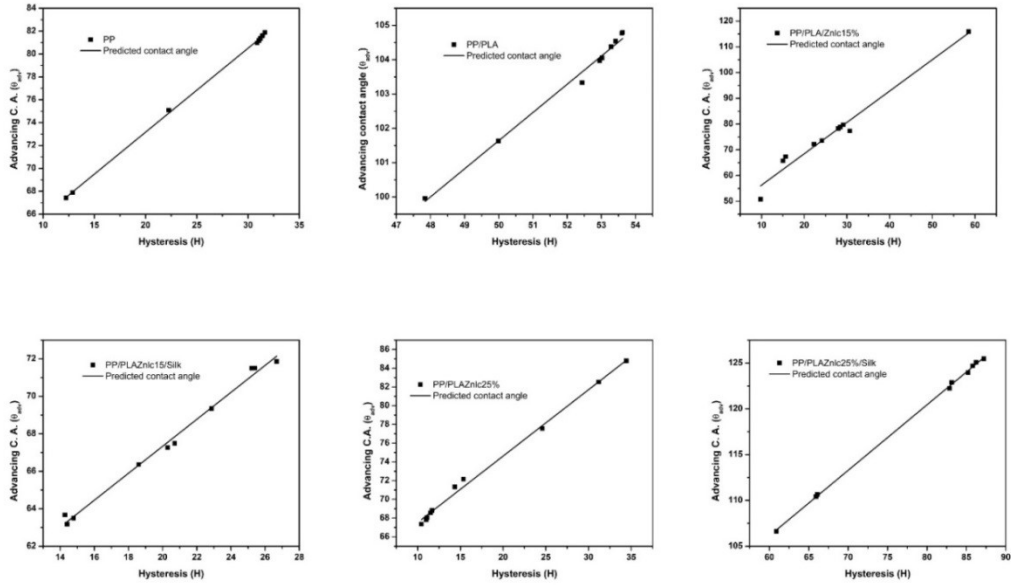

**Figure S4:** Linear plot representing contact angle hysteresis plot of the advancing contact angles of the test samples

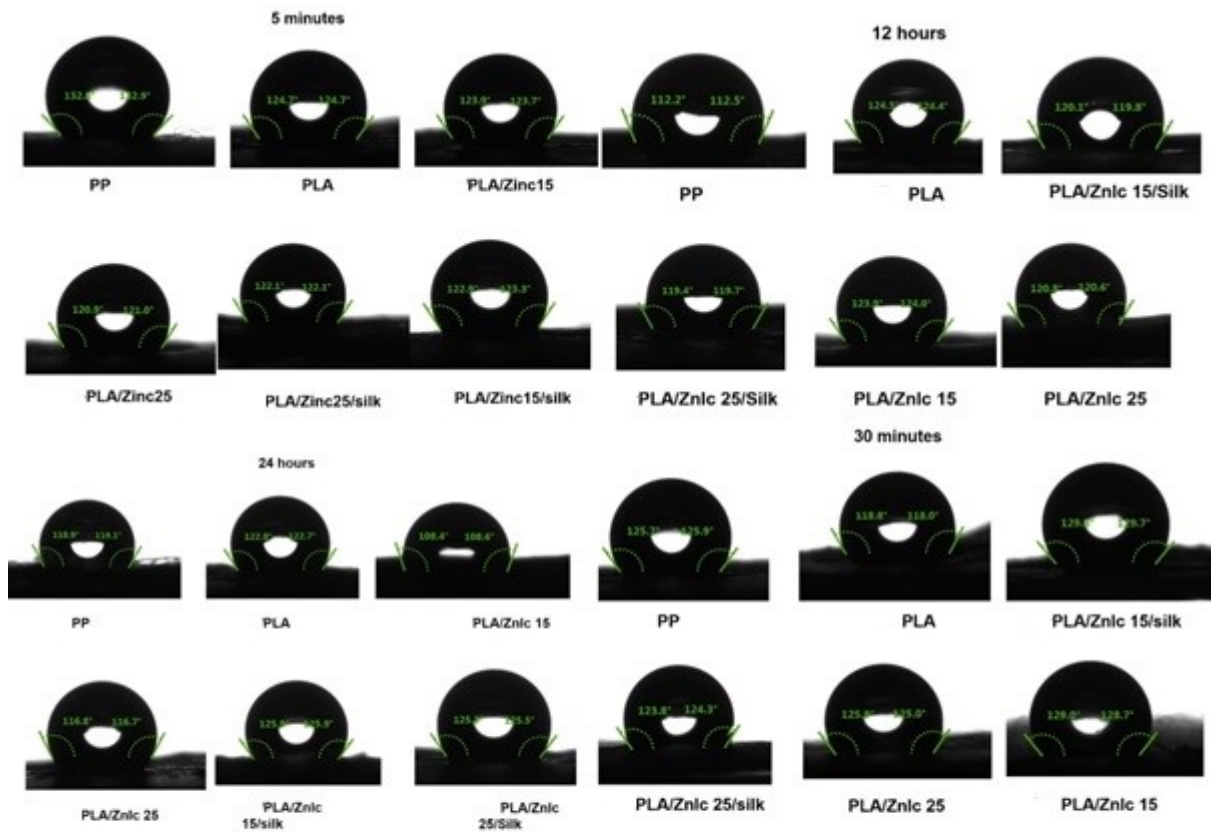

**Figure S5:** Water contact angle images after 5 min-24 hours of dipping treatment. This indicates reusability of the facemasks prepared.

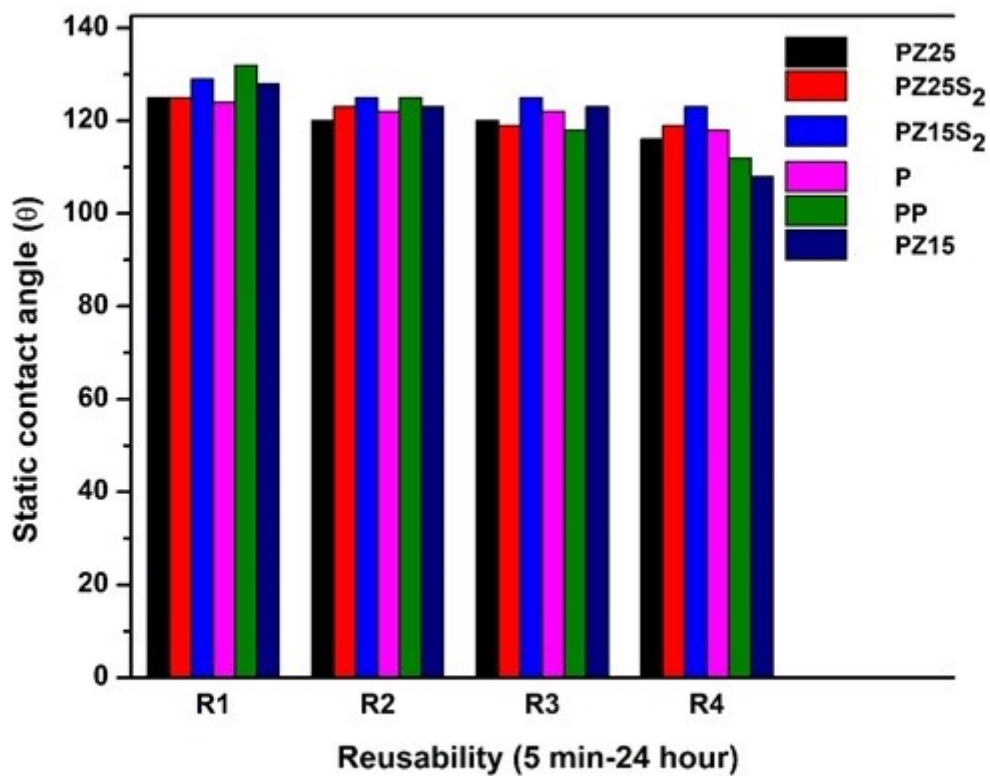

**Figure S6:** Calculated contact angle before and after dipping treatment for 5 min-24 hours. The measured contact angles represent hydrophobicity of the prepared facemasks.

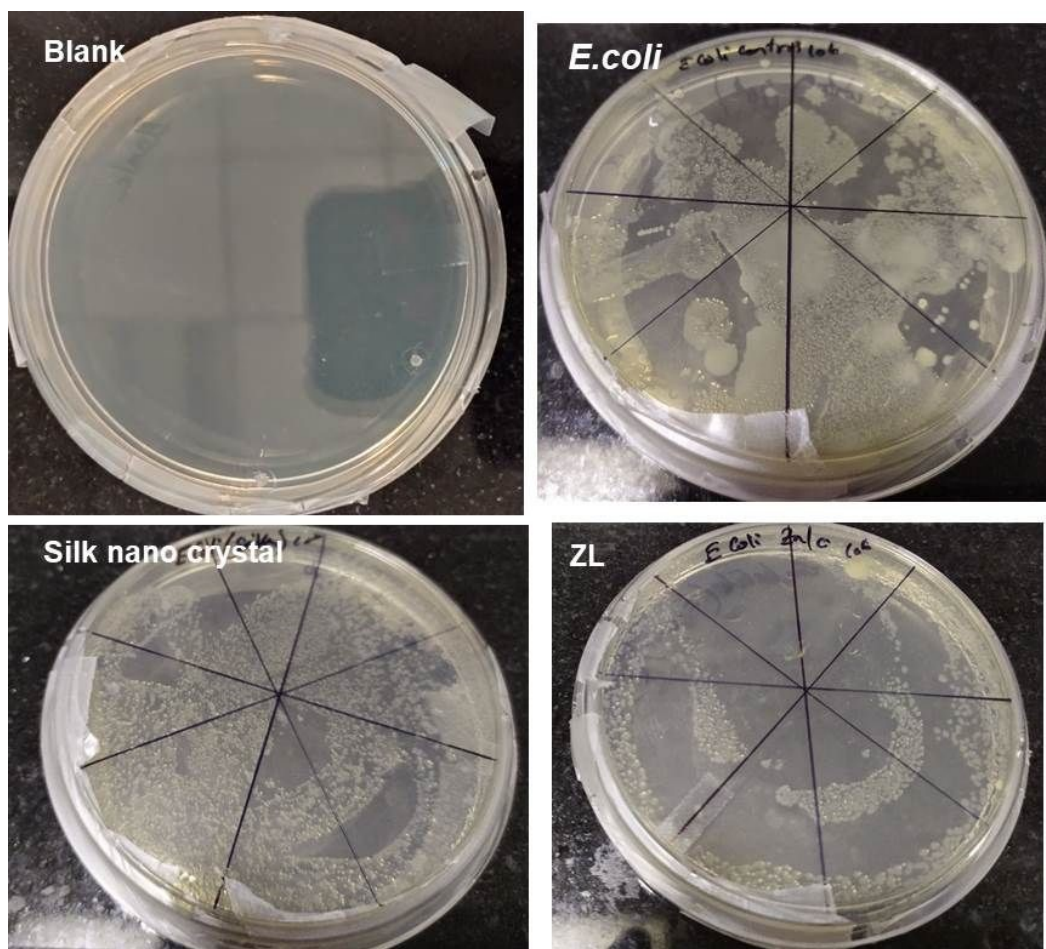

**Figure S7:** A comparative visual images (smart phone camera) of bacterial colony formation for the prepared ZL and SNC against *E.coli*.
